# Supplementary material
Source: MDPI journal article supplement (https://www.mdpi.com/2073-4441/12/1/176)
Supplement: s1 [file s1]

## Supplementary Materials

# Photocatalytic degradation of ampicillin using PLA/TiO<sub>2</sub> hybrid nanofibers coated on different types of fiberglass

Constantin Bobirică <sup>1</sup>, Liliana Bobirică <sup>1</sup> Maria Rapa <sup>2</sup>, Ecaterina Matei <sup>2</sup>, Andra Mihaela Predescu <sup>2</sup>,  
and Cristina Orbeci <sup>1,\*</sup>

<sup>1</sup>Department of Analytical Chemistry and Environmental Engineering, University Politehnica of Bucharest, 1-7 Polizu, 011061 Bucharest, Romania

<sup>2</sup>Department of Metallic Materials Processing and Eco-Metallurgy, University Politehnica of Bucharest, 313 Spl. Independentei, 060042, Bucharest, Romania

\*Correspondence: cristina.orbeci@upb.ro; Tel.: +40721259875

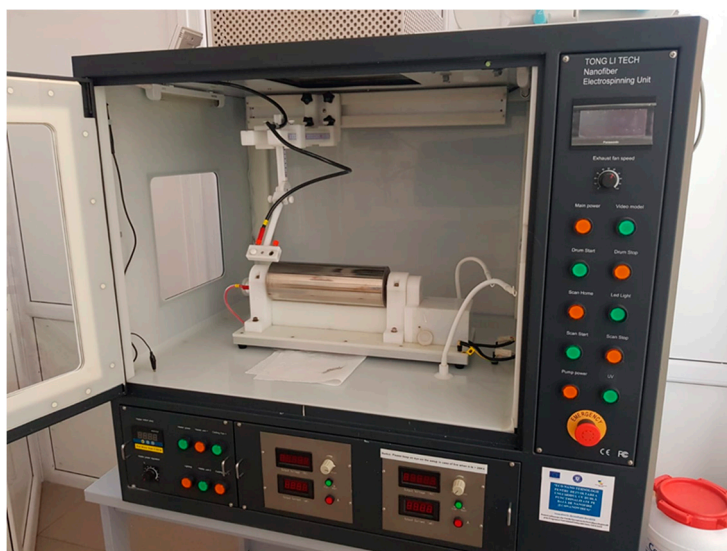

**Figure S1.** TL-Pro-BM Electrospinning equipment

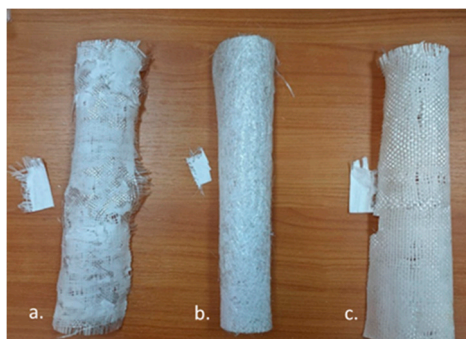

**Figure S2.** Photocatalytic membranes based on PLA/TiO<sub>2</sub> hybrid nanofibers coated on different types of fiberglass: (a) fiberglass fabric one fold edge-type membrane (EWR); (b) fiberglass mat-type membrane (EMC); (c) fiberglass fabric plain woven-type membrane (TEX).

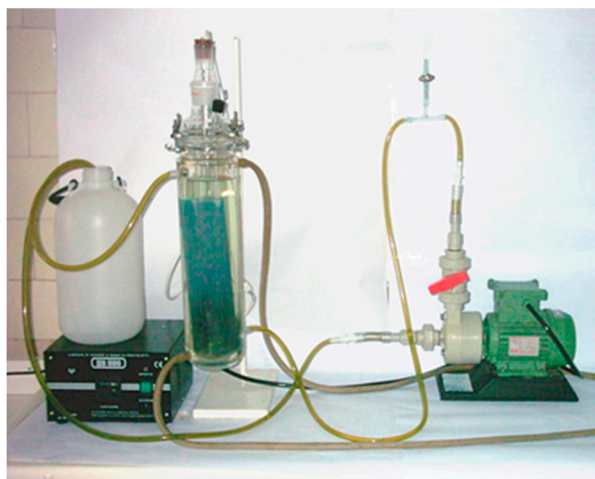

**Figure S3.** UV photocatalytic reactor
